# Supplementary material for: A facile hydrothermal method to BiSbO4 nanoplates with superior photocatalytic performance for benzene and 4-chlorophenol degradations
Source: Royal Society of Chemistry journal article supplement (doi:10.1039/c1dt10130g), 2011-01-01

## Supporting Materials

**Fig.S1** Schematics of the experimental equipment for photocatalytic degradation of benzene

**Fig.S2** Schematics of the experimental equipment for photocatalytic degradation of 4-chlorophenol

**Fig. S3** XRD patterns of the products prepared from  $\text{Sb}_2\text{O}_5$  and  $\text{Bi}(\text{NO}_3)_3 \cdot 5\text{H}_2\text{O}$ , (●)  $\text{Bi}_6\text{O}_6(\text{OH})_3(\text{NO}_3)_3 \cdot 1.5\text{H}_2\text{O}$  (00-053-1038); (◆)  $\text{Sb}_6\text{O}_{13}$  (01-071-1091)

**Fig. S4** XRD patterns of the products prepared from  $\text{Sb}_2\text{O}_3$  and  $\text{BiCl}_3$ , (●)  $\text{BiOCl}$  (01-085-0861); (◆)  $\text{Sb}_2\text{O}_3$  (01-071-0383); (♥)  $\text{Sb}_6\text{O}_{13}$  (00-033-0111); (↓)  $\text{Bi}$  (01-089-2387)

**Fig. S5** XRD patterns of the products prepared from  $\text{Sb}_2\text{O}_5$  and  $\text{BiCl}_3$ , (●)  $\text{BiOCl}$  (01-073-2060); (◆)  $\text{Bi}_2\text{O}_3$  (00-027-0053); (↓)  $\text{Sb}_6\text{O}_{13}$  (00-033-0111); (♥)  $\text{Bi}_6\text{O}_4(\text{OH})_4(\text{Cl}_4)_6(\text{H}_2\text{O})_7$  (01-076-2291)

**Fig. S6** XRD patterns of the products prepared from  $\text{Sb}_2\text{O}_3$  and  $\text{Bi}_5\text{O}(\text{OH})_9(\text{NO}_3)_4$ , (◆)  $\text{BiSbO}_4$  (01-048-0469); (●)  $\text{Bi}_6\text{O}_6(\text{OH})_3(\text{NO}_3)_3 \cdot 1.5\text{H}_2\text{O}$  (00-053-1038); (♥)  $\text{Sb}_2\text{O}_3$  (00-003-0530); (▽)  $\text{Sb}_2\text{O}_5 \cdot \text{H}_2\text{O}$  (01-015-0021); (↑)  $\text{Sb}_2\text{O}_3$  (00-011-0689); (↓)  $\text{NaSb}(\text{OH})_6$  (00-038-0411); (□)  $\text{Bi}_2\text{O}_3$  (00-027-0053)

**Fig. S7** XRD patterns of the products prepared from  $\text{Sb}_2\text{O}_5$  and  $\text{Bi}_5\text{O}(\text{OH})_9(\text{NO}_3)_4$ , (◆)  $\text{Sb}_6\text{O}_{13}$  (00-021-0051); (●)  $\text{Bi}_6\text{O}_6(\text{OH})_3(\text{NO}_3)_3 \cdot 1.5\text{H}_2\text{O}$  (00-053-1038); (↓)  $\text{Bi}_2\text{O}_3$  (00-027-0053)

**Fig. S8** XRD patterns of the products prepared from  $\text{Sb}_2\text{O}_3$  and ammonium bismuth citrate

**Fig. S9** XRD patterns of the products prepared from  $\text{Sb}_2\text{O}_5$  and ammonium bismuth citrate

**Fig. S10** XRD patterns of the products prepared from  $\text{Sb}(\text{Ac})_3$  and  $\text{Bi}(\text{NO}_3)_3 \cdot 5\text{H}_2\text{O}$

**Fig. S11** IR spectra of the starting  $\text{Bi}(\text{NO}_3)_3$  and the mixture of  $\text{Sb}_2\text{O}_3$  and  $\text{Bi}(\text{NO}_3)_3$

**Fig. S12** Temporal evolution of HPLC graphs in the presence of  $\text{BiSbO}_{4(\text{Hy})}$  under UV irradiations (initial concentration of 4-CP,  $3.5 \cdot 10^{-4}$  M; catalyst loading: 1 g/L; pH = 5~6,  $\lambda = 254$  nm)

**Fig. S13** Temporal evolution of HPLC graphs in the presence of  $\text{BiSbO}_{4(\text{SSR})}$  under UV irradiations (initial concentration of 4-CP,  $3.5 \cdot 10^{-4}$  M; catalyst loading: 1 g/L;  $\lambda = 254$  nm)

**Fig. S14** Temporal evolution of HPLC graphs under UV irradiations only (initial concentration of 4-CP,  $3.5 \cdot 10^{-4}$  M,  $\lambda = 254$  nm)

**Fig. S1**

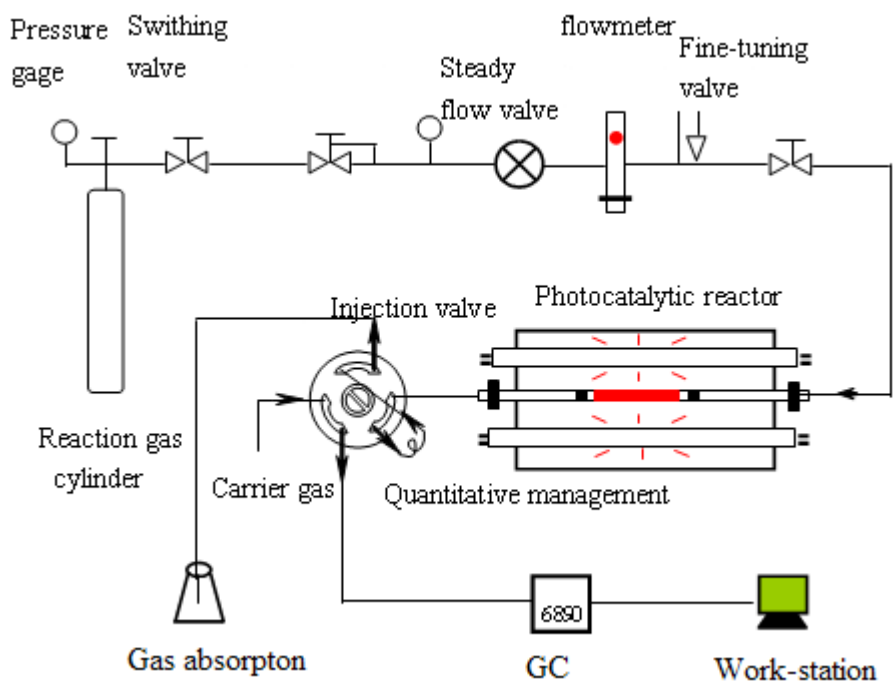

**Fig. S2**

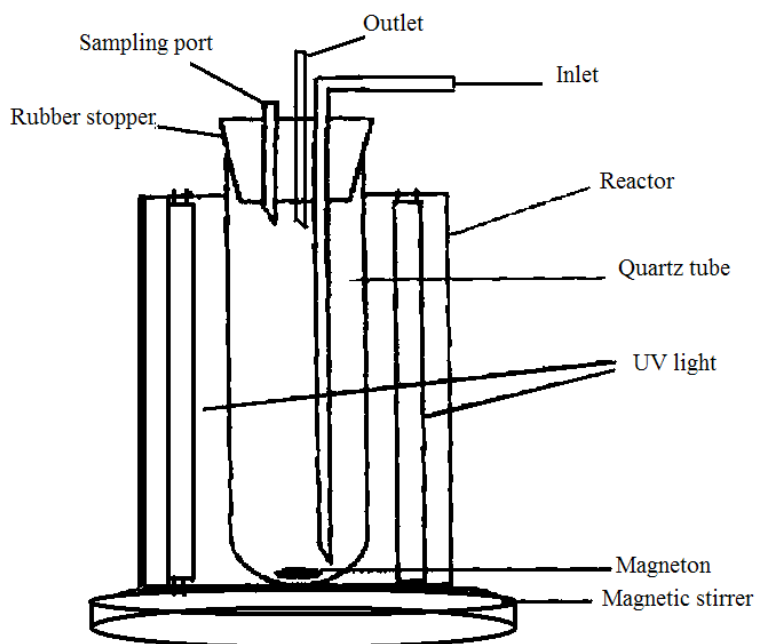

**Fig. S3**

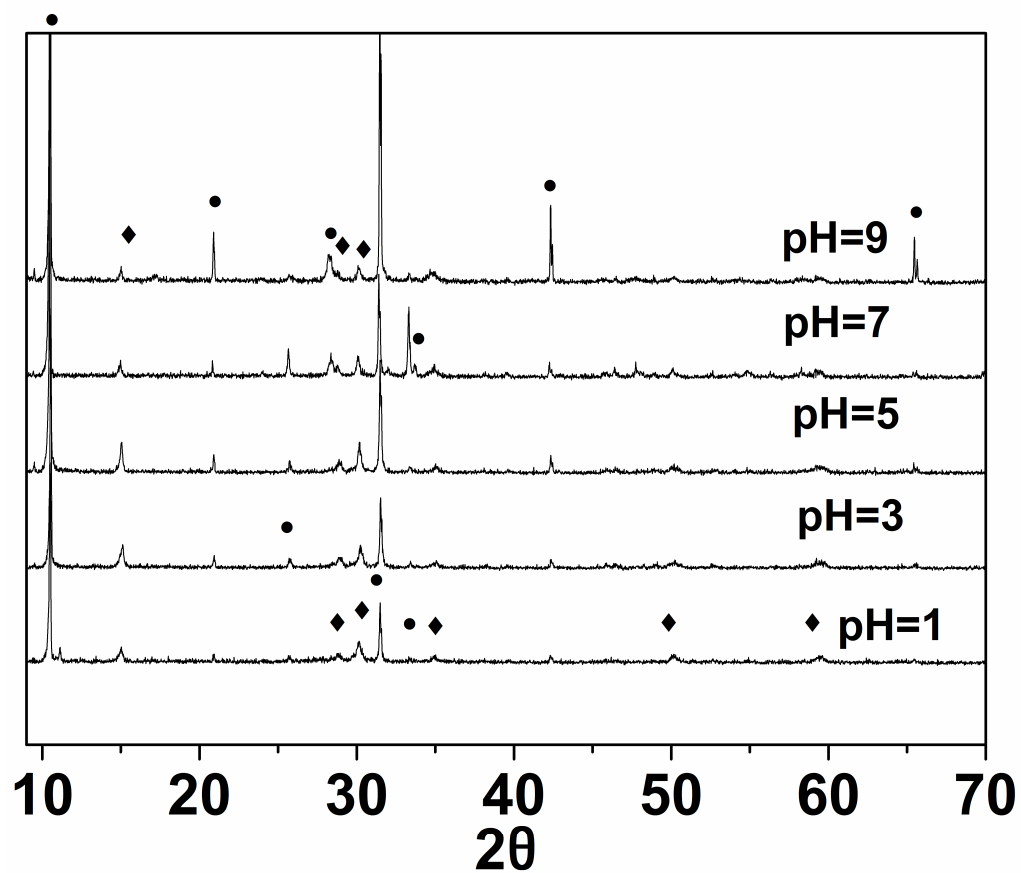

**Fig. S4**

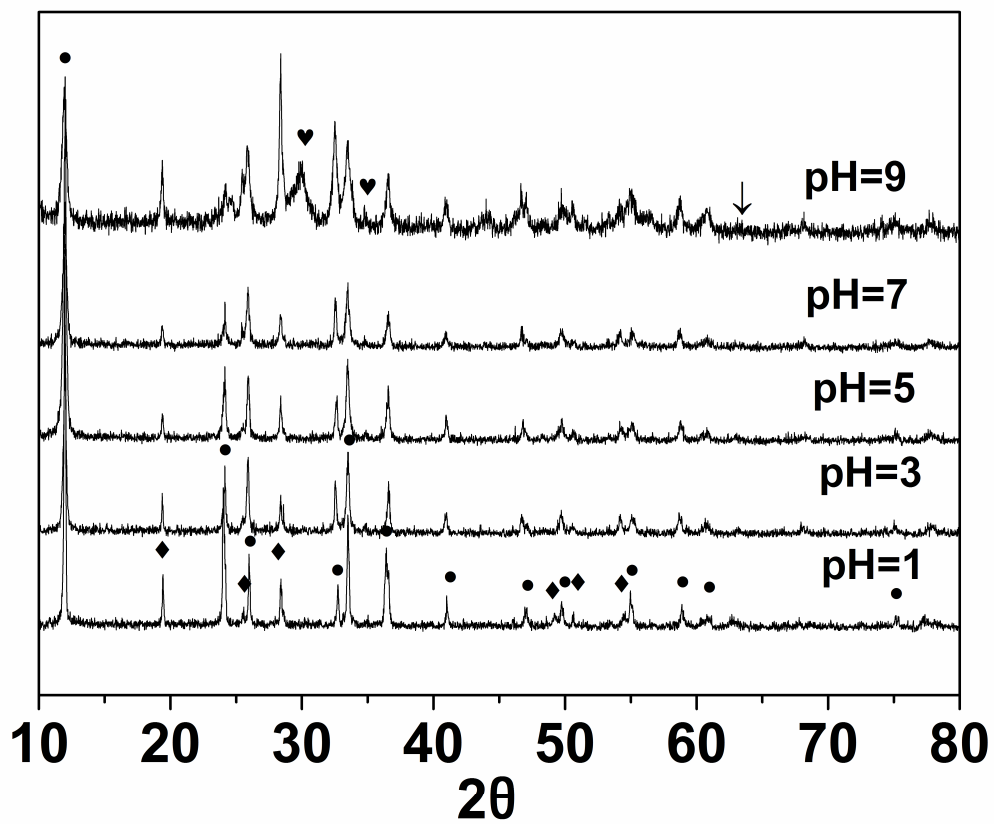

Fig. S5

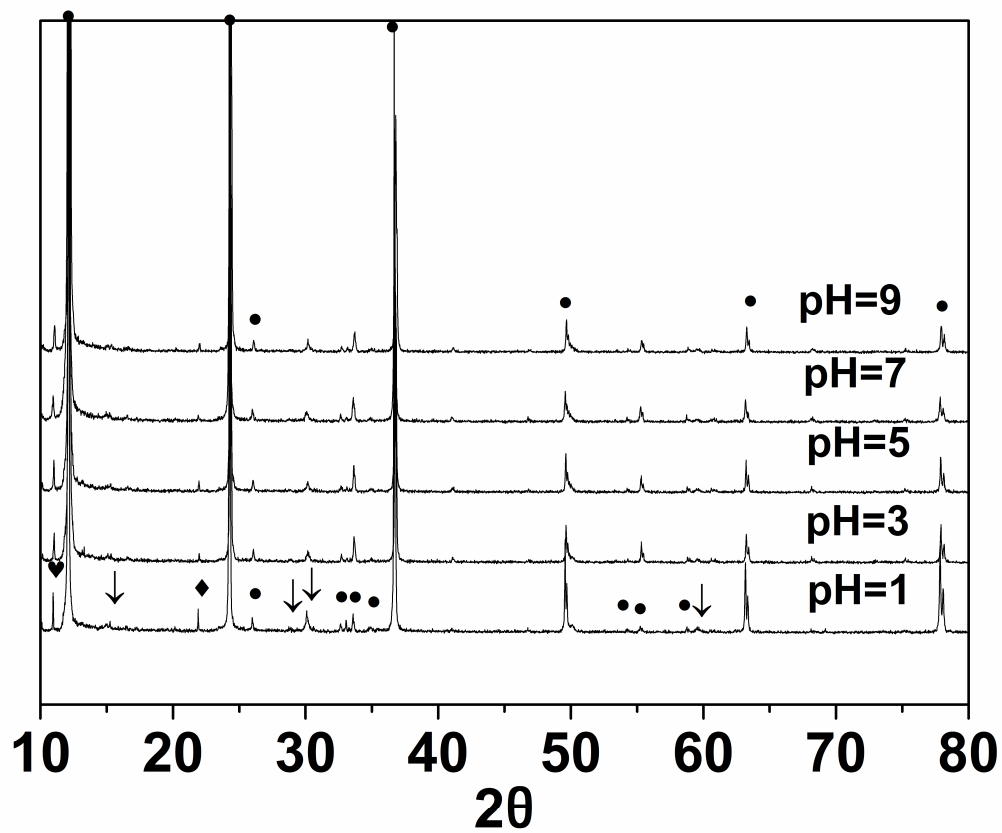

**Fig. S6**

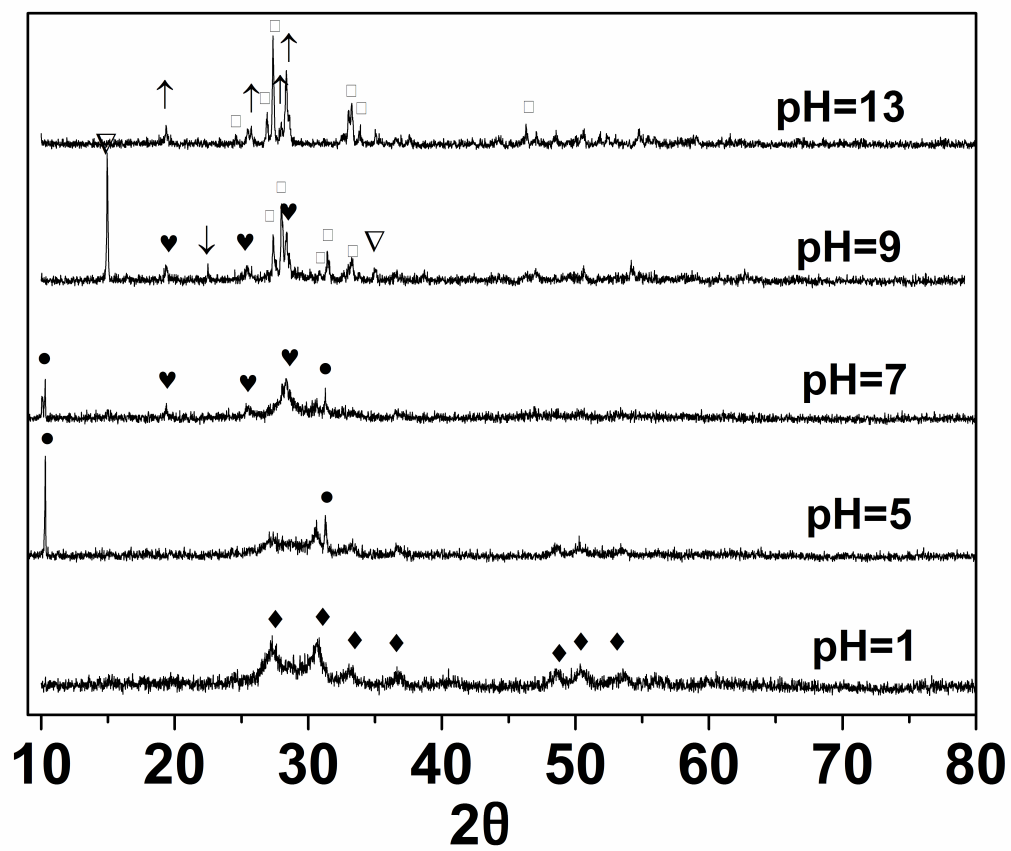

**Fig. S7**

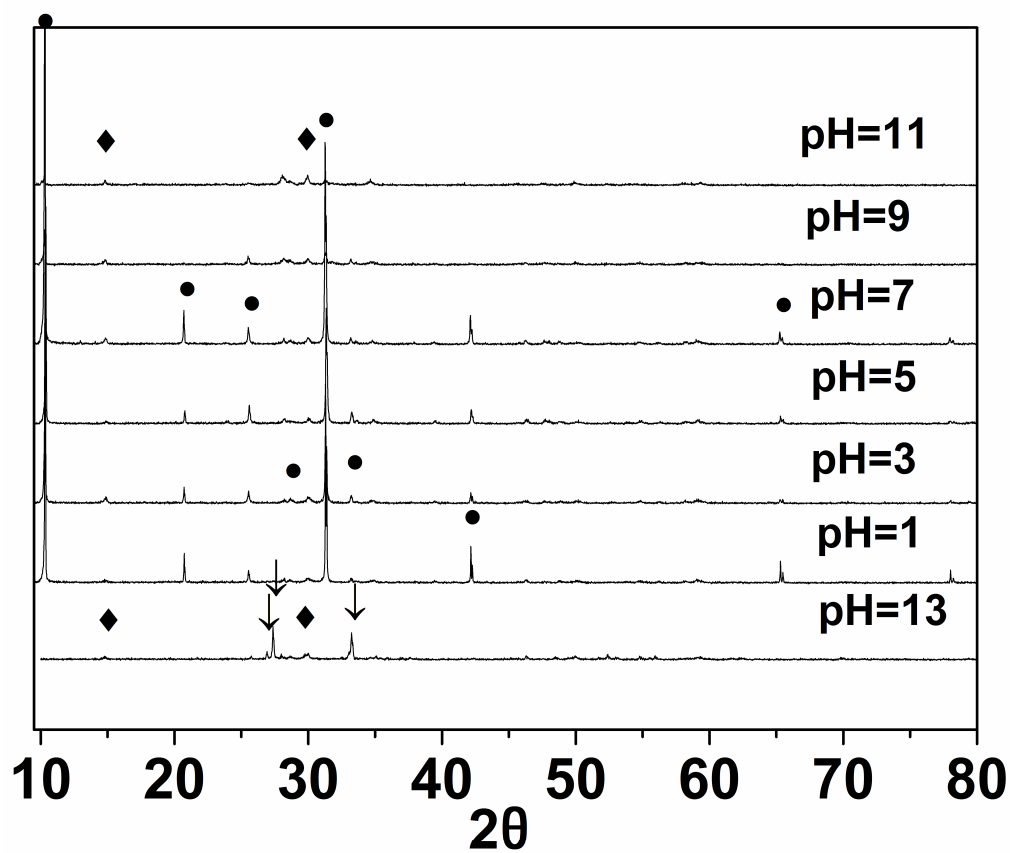



**Fig. S8**

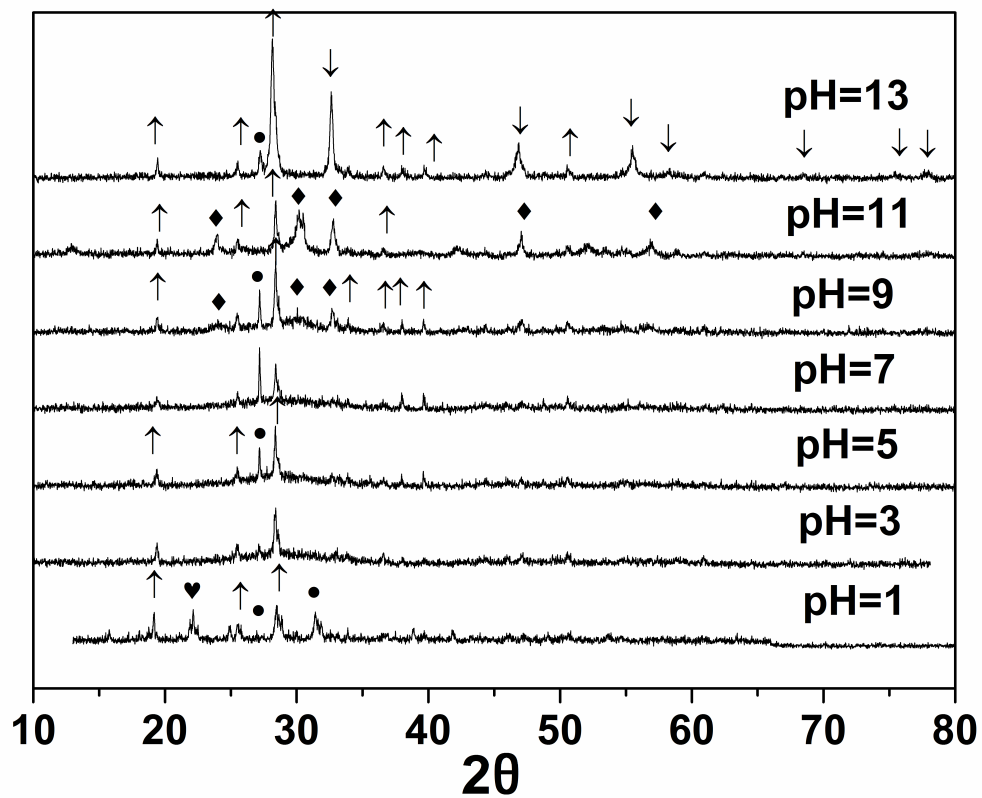

**Fig. S9**

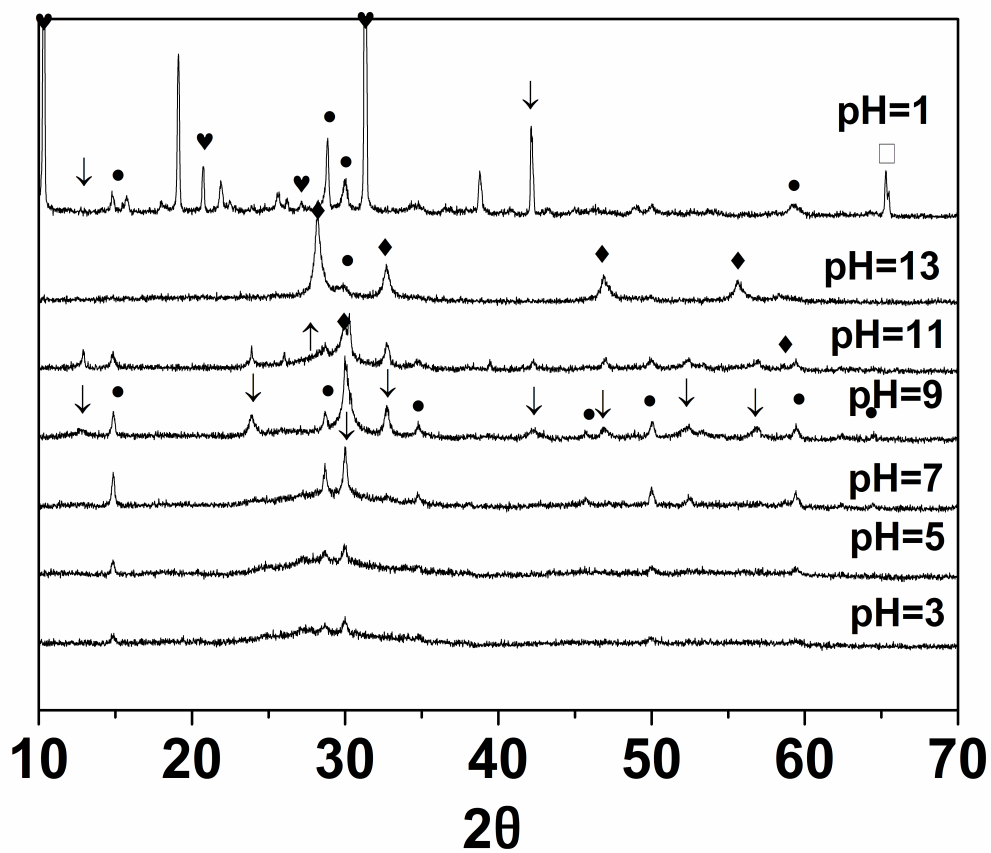

Fig. S10

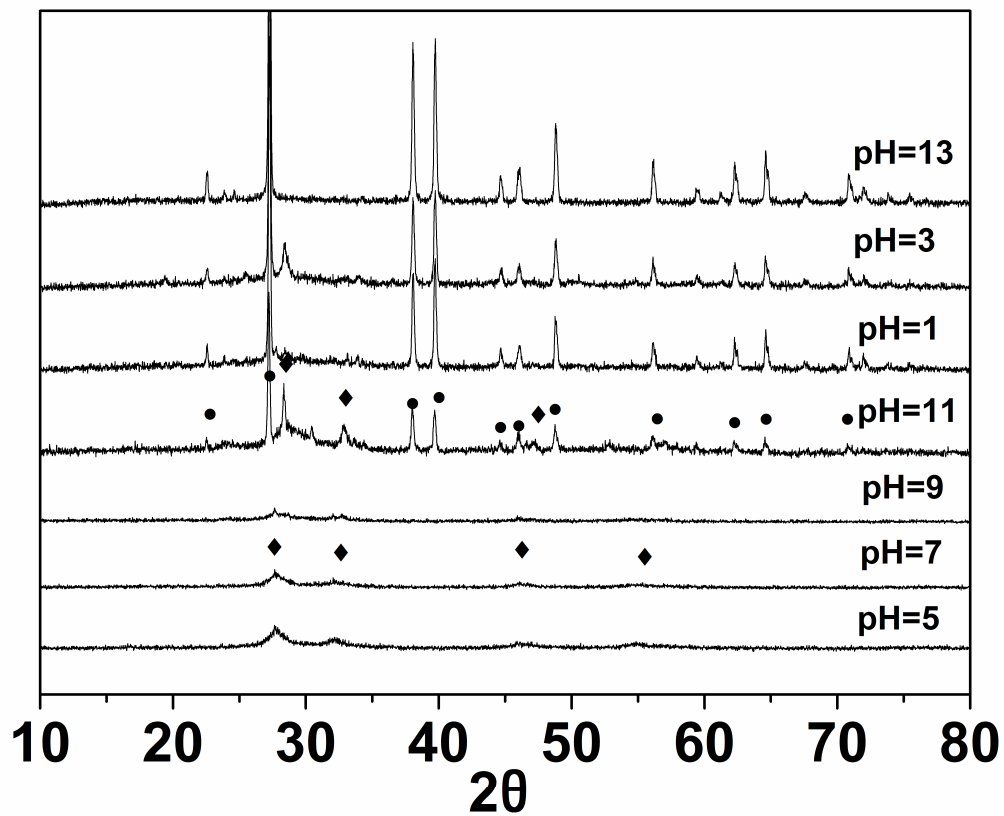

**Fig. S11**

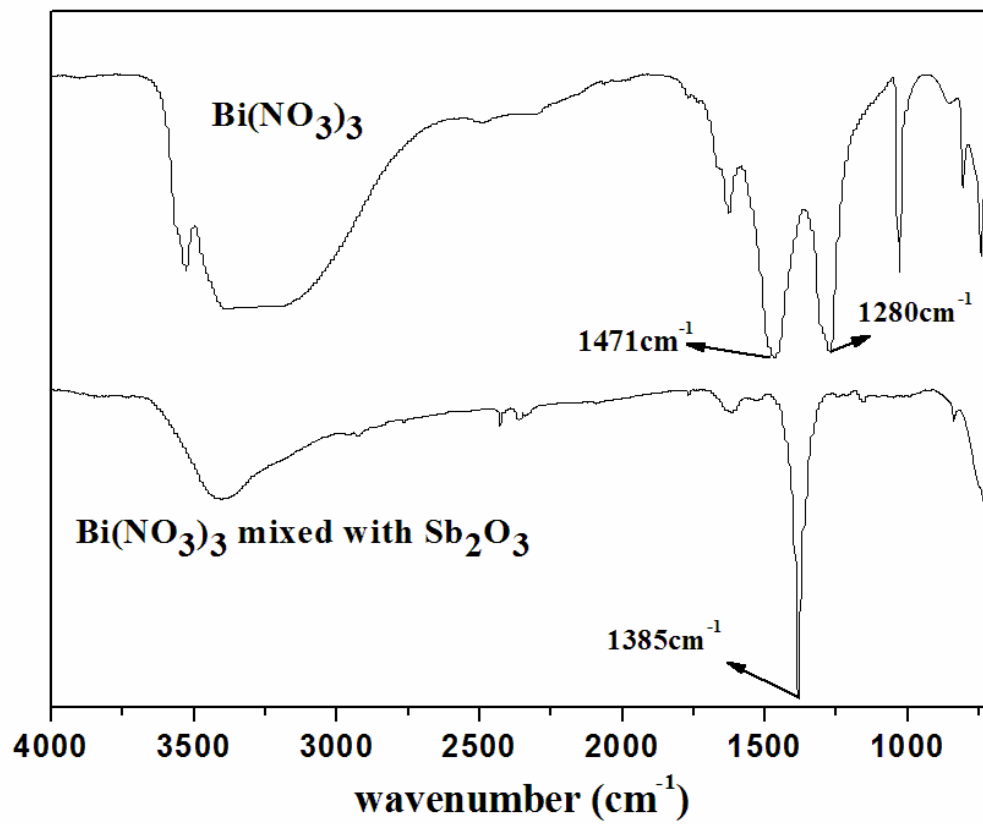

**Fig. S12**

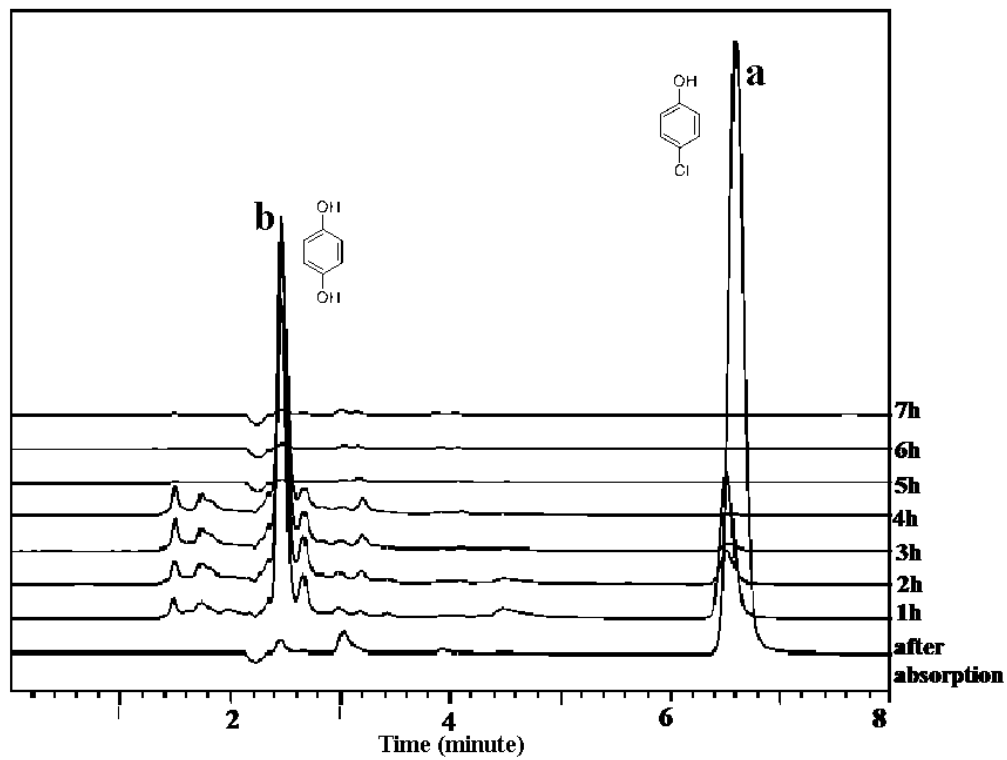

**Fig. S13**

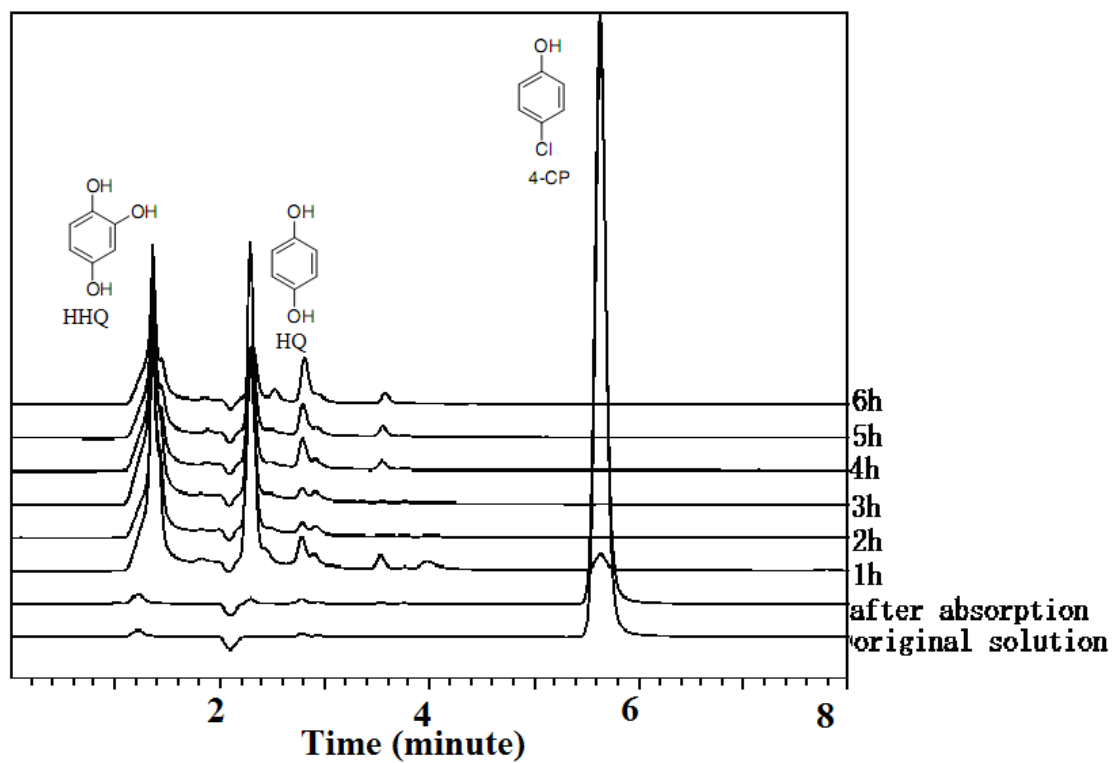

**Fig. S14**

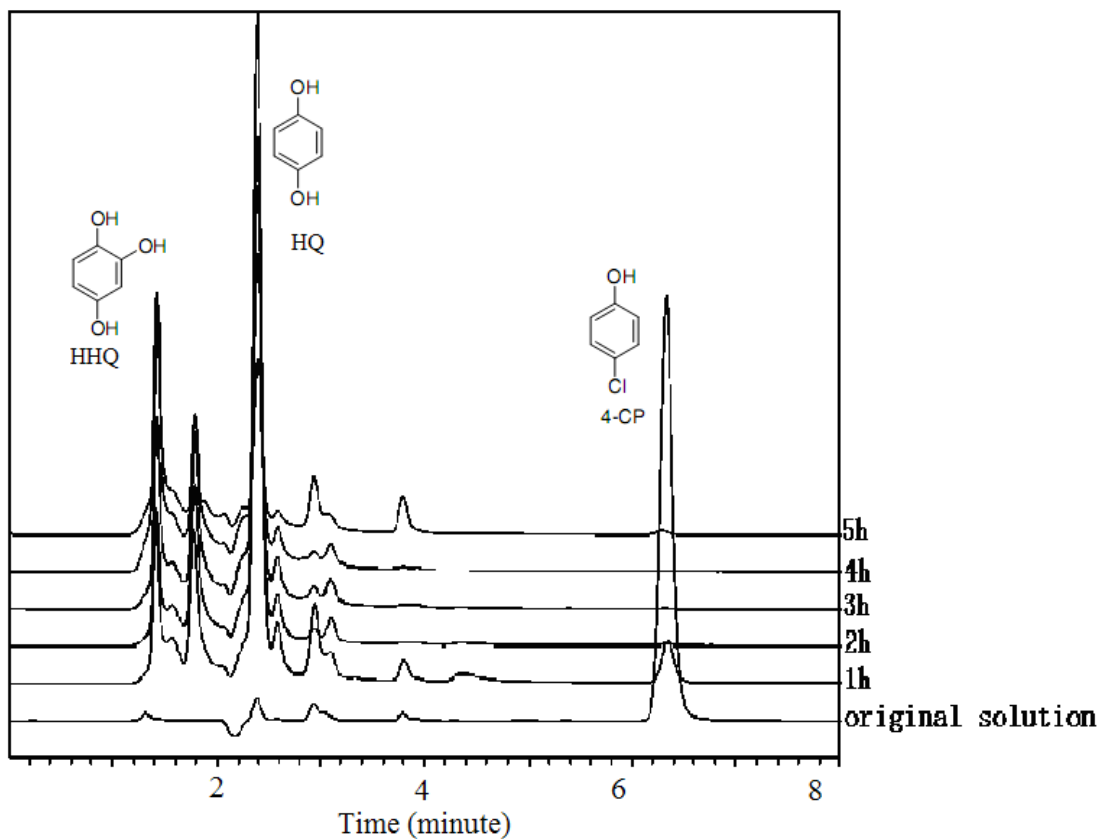

Supplement: c1dt10130g.pdf [file c1dt10130g.pdf]
